# Supplementary material for: Tor1/Sch9-Regulated Carbon Source Substitution Is as Effective as Calorie Restriction in Life Span Extension
Source: PubMed Central journal article supplement (PMC2669710; doi:10.1371/journal.pgen.1000467), 2009-05-08

# Figure S6

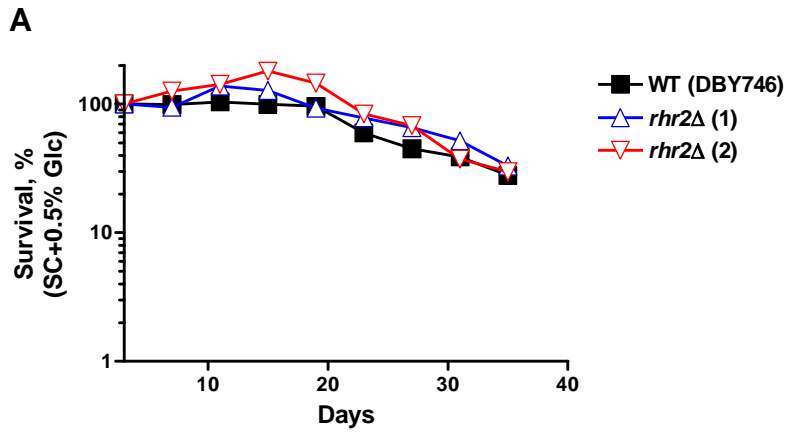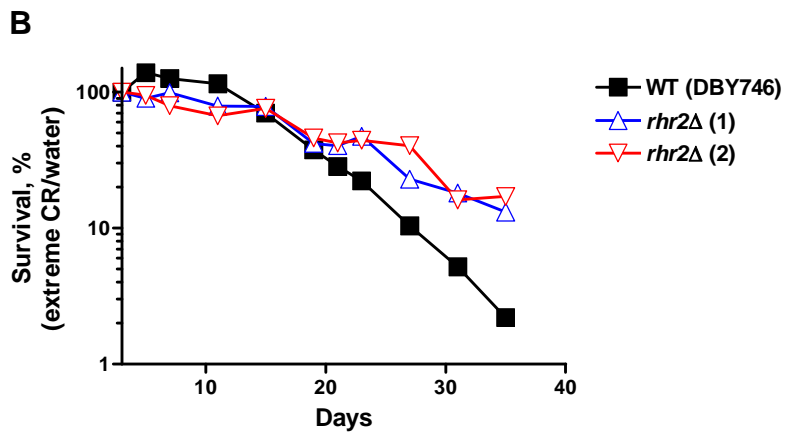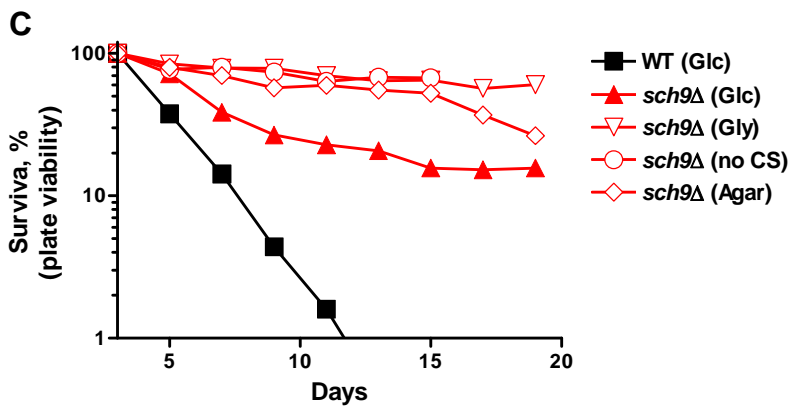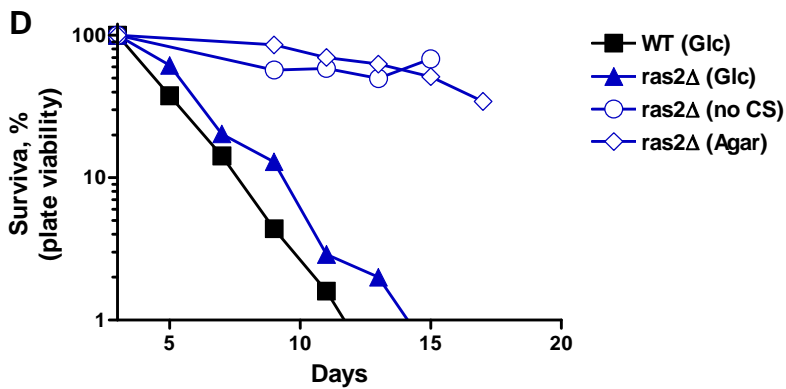

Supplement: pgen.1000467.s006.pdf [file pgen.1000467.s006.pdf]
