# Supplementary material for: Tor1/Sch9-Regulated Carbon Source Substitution Is as Effective as Calorie Restriction in Life Span Extension
Source: PubMed Central journal article supplement (PMC2669710; doi:10.1371/journal.pgen.1000467), 2009-05-08
Supplement: pgen.1000467.s007.pdf [file pgen.1000467.s007.pdf]

**Table S1. Chronological life span of various mutants.**

|                                            | Mean CLS |         | 10% survival |         | n* | p**       |
|--------------------------------------------|----------|---------|--------------|---------|----|-----------|
|                                            | Days     | % of WT | Days         | % of WT |    |           |
| WT (DBY746)                                | 6.5      | 100     | 10.8         | 100     | 48 |           |
| <i>tor1</i> Δ                              | 8.4      | 129     | 16.3         | 151     | 28 | p<0.001** |
| <i>tco89</i> Δ                             | 7.5      | 115     | -            | -       | 5  |           |
| <i>sch9</i> Δ                              | 15.3     | 235     | 27.3         | 253     | 31 | p<0.001   |
| <i>ras2</i> Δ                              | 18.3     | 282     | 29.2         | 270     | 14 | p<0.001   |
| <i>ras2</i> Δ <i>tor1</i> Δ                | 15.7     | 242     | 28.5         | 264     | 4  |           |
| <i>ras2</i> Δ <i>sch9</i> Δ                | 34.3     | 528     | -            | -       | 8  | p<0.001   |
| <i>sch9</i> Δ <i>tor1</i> Δ                | 15.0     | 231     | 28.1         | 260     | 6  | p<0.001   |
| <i>ras2</i> Δ <i>sch9</i> Δ <i>tor1</i> Δ  | 32.4     | 498     | -            | -       | 5  | p<0.001   |
| <i>RAS2</i> <sup>Val19</sup>               | 7.3      | 112     | 10.0         | 93      | 4  |           |
| <i>SCH9</i>                                | 6.8      | 105     | 9.8          | 91      | 8  |           |
| <i>tor1</i> Δ <i>RAS2</i> <sup>Val19</sup> | 6.6      | 102     | 10.5         | 97      | 4  |           |
| <i>tor1</i> Δ <i>SCH9</i>                  | 6.3      | 97      | 9.5          | 88      | 8  |           |
| <i>sch9</i> Δ <i>ycl218w</i> Δ             | 11.4     | 176     | 23.7         | 220     | 8  |           |
| <i>sch9</i> Δ <i>ime1</i> Δ                | 18.9     | 291     | 28.0         | 259     | 3  |           |
| <i>sch9</i> Δ <i>rpi1</i> Δ                | 16.2     | 249     | 26.3         | 244     | 5  |           |
| <i>sch9</i> Δ <i>fmp45</i> Δ               | 11.8     | 182     | 21.9         | 203     | 2  |           |
