# Supplementary material for: Tor1/Sch9-Regulated Carbon Source Substitution Is as Effective as Calorie Restriction in Life Span Extension
Source: PubMed Central journal article supplement (PMC2669710; doi:10.1371/journal.pgen.1000467), 2009-05-08
Supplement: pgen.1000467.s009.pdf [file pgen.1000467.s009.pdf]

**Table S3.** The significance of overlapping in up- and down-regulated genes between long-lived mutants.

|                       |                                       | <i>p</i> |
|-----------------------|---------------------------------------|----------|
| <hr/>                 |                                       |          |
| <i>tor1Δ vs.sch9Δ</i> |                                       |          |
| up                    | sum(dhyper(76:130,145, 5667-145,130)) | 3.31e-95 |
| down                  | sum(dhyper(30:61,121, 5667-121,61))   | 2.31e-35 |
| <hr/>                 |                                       |          |
| <i>ras2Δ vs.sch9Δ</i> |                                       |          |
| up                    | sum(dhyper(98:322,145, 5667-145,322)) | 6.54e-92 |
| down                  | sum(dhyper(72:349,118, 5667-118,349)) | 5.68e-59 |
| <hr/>                 |                                       |          |
| <i>tor1Δ vs.ras2Δ</i> |                                       |          |
| up                    | sum(dhyper(94:130,322, 5667-322,130)) | 1.77e-92 |
| down                  | sum(dhyper(43:61,349, 5667-349,61))   | 3.43e-39 |
| <hr/>                 |                                       |          |
