# Supplementary material for: Tor1/Sch9-Regulated Carbon Source Substitution Is as Effective as Calorie Restriction in Life Span Extension
Source: PubMed Central journal article supplement (PMC2669710; doi:10.1371/journal.pgen.1000467), 2009-05-08
Supplement: pgen.1000467.s010.pdf [file pgen.1000467.s010.pdf]

**Table S4 Gene ontology (GO) analysis of expression profiles of long-lived mutants.****Positively affected TIGO categories**

| GO* | GO ID      | Gene # | Annotation                                            | <i>sch9</i> Δ   |                 | <i>tor1</i> Δ   |                 | <i>ras2</i> Δ   |                 |
|-----|------------|--------|-------------------------------------------------------|-----------------|-----------------|-----------------|-----------------|-----------------|-----------------|
|     |            |        |                                                       | p-value         | q-value         | p-value         | q-value         | p-value         | q-value         |
| C   | GO:0005842 | 93     | cytosolic large ribosomal subunit                     | <b>0</b>        | <b>0</b>        | <b>0</b>        | <b>0</b>        | <b>1.64E-12</b> | <b>2.37E-10</b> |
| C   | GO:0005843 | 63     | cytosolic small ribosomal subunit                     | <b>0</b>        | <b>0</b>        | <b>0</b>        | <b>0</b>        | <b>7.49E-09</b> | <b>6.49E-07</b> |
| F   | GO:0003735 | 229    | structural constituent of ribosome                    | <b>1.82E-05</b> | <b>6.86E-04</b> | <b>1.41E-05</b> | <b>5.57E-04</b> | 5.45E-01        | 8.71E-01        |
| P   | GO:0007047 | 140    | cell wall organization and biogenesis                 | <b>2.35E-04</b> | <b>5.51E-03</b> | <b>3.52E-02</b> | 1.99E-01        | <b>4.68E-03</b> | 5.38E-02        |
| C   | GO:0005794 | 130    | Golgi apparatus                                       | <b>4.34E-04</b> | <b>9.18E-03</b> | <b>2.97E-02</b> | 1.81E-01        | 3.33E-01        | 8.71E-01        |
| P   | GO:0042364 | 36     | water-soluble vitamin biosynthesis                    | <b>8.72E-04</b> | <b>1.51E-02</b> | <b>1.27E-02</b> | 1.04E-01        | <b>2.25E-04</b> | <b>5.51E-03</b> |
| P   | GO:0046365 | 33     | monosaccharide catabolism                             | <b>1.32E-03</b> | <b>2.01E-02</b> | <b>2.94E-05</b> | <b>1.02E-03</b> | <b>8.81E-06</b> | <b>3.81E-04</b> |
| P   | GO:0016125 | 37     | sterol metabolism                                     | <b>5.65E-03</b> | 6.20E-02        | <b>7.50E-03</b> | 7.56E-02        | <b>7.51E-05</b> | <b>2.32E-03</b> |
| P   | GO:0006487 | 43     | protein amino acid N-linked glycosylation             | <b>6.94E-03</b> | 7.16E-02        | <b>3.10E-02</b> | 1.85E-01        | <b>4.99E-05</b> | <b>1.66E-03</b> |
| C   | GO:0031226 | 31     | intrinsic to plasma membrane                          | <b>8.60E-03</b> | 8.19E-02        | <b>2.91E-02</b> | 1.80E-01        | <b>7.05E-05</b> | <b>2.26E-03</b> |
| F   | GO:0000030 | 42     | mannosyltransferase activity                          | <b>1.06E-02</b> | 9.44E-02        | 6.23E-02        | 2.83E-01        | <b>9.70E-05</b> | <b>2.90E-03</b> |
| F   | GO:0046873 | 38     | metal ion transporter activity                        | <b>1.38E-02</b> | 1.09E-01        | <b>2.32E-02</b> | 1.55E-01        | <b>1.39E-04</b> | <b>3.77E-03</b> |
| F   | GO:0015082 | 35     | di-, tri-valent inorganic cation transporter activity | <b>2.27E-02</b> | 1.55E-01        | <b>1.25E-02</b> | 1.03E-01        | <b>1.20E-04</b> | <b>3.48E-03</b> |
| C   | GO:0005789 | 115    | endoplasmic reticulum membrane                        | <b>2.36E-02</b> | 1.56E-01        | <b>5.51E-03</b> | 6.12E-02        | <b>6.46E-07</b> | <b>4.59E-05</b> |
| C   | GO:0005811 | 33     | lipid particle                                        | 5.19E-02        | 2.56E-01        | 6.89E-02        | 3.02E-01        | 5.16E-02        | 2.55E-01        |
| P   | GO:0008643 | 32     | carbohydrate transport                                | 1.45E-01        | 5.24E-01        | <b>4.72E-03</b> | 5.38E-02        | <b>1.89E-06</b> | <b>1.09E-04</b> |
| P   | GO:0030384 | 31     | phosphoinositide metabolism                           | 5.64E-01        | 8.71E-01        | 5.82E-01        | 8.71E-01        | <b>4.60E-04</b> | <b>9.49E-03</b> |
| C   | GO:0009277 | 111    | cell wall                                             | 8.91E-01        | 8.71E-01        | <b>6.19E-06</b> | <b>2.98E-04</b> | <b>5.65E-06</b> | <b>2.88E-04</b> |
| P   | GO:0046474 | 34     | glycerophospholipid biosynthesis                      | 9.85E-01        | 8.71E-01        | 8.64E-01        | 8.71E-01        | <b>4.19E-02</b> | 2.21E-01        |

**Negatively affected TIGO categories**

| GO* | GO ID      | Gene # | Annotation                                 | <i>sch9</i> Δ   |                 | <i>tor1</i> Δ   |                 | <i>ras2</i> Δ   |                 |
|-----|------------|--------|--------------------------------------------|-----------------|-----------------|-----------------|-----------------|-----------------|-----------------|
|     |            |        |                                            | p-value         | q-value         | p-value         | q-value         | p-value         | q-value         |
| C   | GO:0005762 | 43     | mitochondrial large ribosomal subunit      | <b>1.56E-19</b> | <b>3.32E-17</b> | <b>1.13E-20</b> | <b>4.29E-18</b> | <b>1.34E-20</b> | <b>4.29E-18</b> |
| C   | GO:0005763 | 34     | mitochondrial small ribosomal subunit      | <b>6.94E-13</b> | <b>4.93E-11</b> | <b>3.17E-13</b> | <b>2.54E-11</b> | <b>4.83E-14</b> | <b>4.41E-12</b> |
| C   | GO:0016591 | 74     | DNA-directed RNA polymerase II, holoenzyme | <b>1.61E-05</b> | <b>2.29E-04</b> | <b>9.05E-05</b> | <b>8.65E-04</b> | <b>4.97E-10</b> | <b>2.27E-08</b> |
| C   | GO:0000778 | 47     | condensed nuclear chromosome kinetochore   | <b>2.24E-02</b> | 5.37E-02        | 8.02E-02        | 1.34E-01        | <b>4.68E-04</b> | <b>2.88E-03</b> |
| C   | GO:0005875 | 35     | microtubule associated complex             | <b>4.31E-02</b> | 8.61E-02        | 3.67E-01        | 4.20E-01        | <b>2.50E-03</b> | <b>1.12E-02</b> |
| C   | GO:0016585 | 71     | chromatin remodeling complex               | 6.61E-02        | 1.16E-01        | <b>3.38E-03</b> | <b>1.39E-02</b> | <b>9.96E-08</b> | <b>3.04E-06</b> |
| C   | GO:0000502 | 46     | proteasome complex                         | <b>3.92E-04</b> | <b>2.56E-03</b> | <b>4.51E-03</b> | <b>1.72E-02</b> | <b>1.35E-08</b> | <b>4.79E-07</b> |
| C   | GO:0005684 | 37     | major (U2-dependent) spliceosome           | <b>2.27E-02</b> | 5.40E-02        | 1.45E-01        | 2.08E-01        | <b>7.28E-05</b> | <b>7.39E-04</b> |
| C   | GO:0000123 | 39     | histone acetyltransferase complex          | <b>1.87E-02</b> | <b>4.77E-02</b> | <b>3.39E-03</b> | <b>1.39E-02</b> | <b>1.52E-05</b> | <b>2.21E-04</b> |
| C   | GO:0046540 | 30     | U4/U6 x U5 tri-snRNP complex               | 1.82E-01        | 2.48E-01        | 6.38E-01        | 6.11E-01        | <b>1.44E-02</b> | <b>4.05E-02</b> |
| C   | GO:0030880 | 32     | RNA polymerase complex                     | <b>6.80E-03</b> | <b>2.30E-02</b> | <b>1.65E-02</b> | <b>4.38E-02</b> | 5.73E-02        | 1.05E-01        |
| C   | GO:0000131 | 35     | incipient bud site                         | 6.35E-01        | 6.09E-01        | <b>4.38E-02</b> | 8.72E-02        | <b>2.22E-03</b> | <b>1.02E-02</b> |
| C   | GO:0005934 | 50     | bud tip                                    | 4.39E-01        | 4.73E-01        | 1.87E-01        | 2.55E-01        | <b>2.13E-03</b> | <b>9.94E-03</b> |
| C   | GO:0000790 | 36     | nuclear chromatin                          | 3.85E-01        | 4.30E-01        | 1.64E-01        | 2.29E-01        | <b>1.76E-03</b> | <b>8.53E-03</b> |
| C   | GO:0005643 | 50     | nuclear pore                               | 8.66E-02        | 1.42E-01        | <b>8.60E-03</b> | <b>2.78E-02</b> | <b>1.43E-03</b> | <b>7.34E-03</b> |
| C   | GO:0005743 | 158    | mitochondrial inner membrane               | <b>2.64E-16</b> | <b>2.82E-14</b> | <b>3.56E-17</b> | <b>5.70E-15</b> | <b>3.14E-09</b> | <b>1.34E-07</b> |
| F   | GO:0003924 | 59     | GTPase activity                            | <b>3.73E-02</b> | 7.82E-02        | 6.45E-02        | 1.13E-01        | <b>3.66E-05</b> | <b>4.59E-04</b> |

|   |            |     |                                                                      |                 |                 |                 |                 |                 |                 |
|---|------------|-----|----------------------------------------------------------------------|-----------------|-----------------|-----------------|-----------------|-----------------|-----------------|
| F | GO:0016251 | 62  | general RNA polymerase II transcription factor activity              | <b>1.87E-02</b> | <b>4.77E-02</b> | <b>2.18E-02</b> | 5.30E-02        | <b>1.38E-06</b> | <b>3.04E-05</b> |
| F | GO:0005478 | 30  | intracellular transporter activity                                   | 1.07E-01        | 1.65E-01        | 2.46E-01        | 3.18E-01        | <b>1.20E-03</b> | <b>6.41E-03</b> |
| F | GO:0005083 | 58  | small GTPase regulator activity                                      | 9.81E-01        | 6.43E-01        | 2.93E-01        | 3.61E-01        | <b>1.87E-02</b> | <b>4.77E-02</b> |
| F | GO:0008080 | 37  | N-acetyltransferase activity                                         | <b>6.89E-03</b> | <b>2.32E-02</b> | <b>6.43E-03</b> | <b>2.25E-02</b> | <b>3.16E-04</b> | <b>2.20E-03</b> |
| F | GO:0003899 | 33  | DNA-directed RNA polymerase activity                                 | <b>4.52E-03</b> | <b>1.72E-02</b> | <b>9.58E-03</b> | <b>3.02E-02</b> | <b>4.26E-02</b> | 8.54E-02        |
| F | GO:0008757 | 61  | S-adenosylmethionine-dependent methyltransferase activity            | <b>3.68E-03</b> | <b>1.48E-02</b> | <b>5.29E-03</b> | <b>1.98E-02</b> | 1.16E-01        | 1.76E-01        |
| F | GO:0004519 | 56  | endonuclease activity                                                | 5.26E-02        | 9.84E-02        | <b>4.90E-02</b> | 9.28E-02        | <b>1.71E-03</b> | <b>8.41E-03</b> |
| F | GO:0004540 | 100 | ribonuclease activity                                                | 5.73E-02        | 1.05E-01        | <b>3.00E-03</b> | <b>1.30E-02</b> | <b>4.49E-04</b> | <b>2.79E-03</b> |
| F | GO:0004527 | 33  | exonuclease activity                                                 | 1.00E-01        | 1.58E-01        | <b>1.84E-03</b> | <b>8.87E-03</b> | <b>1.21E-03</b> | <b>6.41E-03</b> |
| F | GO:0003724 | 41  | RNA helicase activity                                                | <b>3.01E-02</b> | 6.75E-02        | <b>4.44E-04</b> | <b>2.79E-03</b> | <b>4.07E-02</b> | 8.30E-02        |
| F | GO:0008026 | 37  | ATP-dependent helicase activity                                      | 6.70E-02        | 1.17E-01        | <b>1.41E-03</b> | <b>7.30E-03</b> | <b>3.22E-02</b> | 7.10E-02        |
| F | GO:0008565 | 50  | protein transporter activity                                         | <b>2.70E-04</b> | <b>1.94E-03</b> | <b>7.99E-05</b> | <b>7.87E-04</b> | <b>1.48E-02</b> | <b>4.11E-02</b> |
| P | GO:0008652 | 99  | amino acid biosynthesis                                              | 6.61E-01        | 6.22E-01        | <b>2.00E-06</b> | <b>4.13E-05</b> | 4.07E-01        | 4.48E-01        |
| P | GO:0000398 | 97  | nuclear mRNA splicing, via spliceosome                               | <b>1.01E-02</b> | <b>3.14E-02</b> | 6.60E-02        | 1.16E-01        | <b>6.16E-06</b> | <b>1.01E-04</b> |
| P | GO:0006906 | 30  | vesicle fusion                                                       | 1.89E-01        | 2.57E-01        | 3.05E-01        | 3.68E-01        | <b>5.34E-03</b> | <b>1.99E-02</b> |
| P | GO:0006367 | 44  | transcription initiation from RNA polymerase II promoter             | <b>3.23E-02</b> | 7.10E-02        | <b>8.55E-03</b> | <b>2.78E-02</b> | <b>9.23E-06</b> | <b>1.37E-04</b> |
| P | GO:0006406 | 60  | mRNA-nucleus export                                                  | <b>4.54E-02</b> | 8.79E-02        | <b>3.70E-04</b> | <b>2.44E-03</b> | <b>1.37E-04</b> | <b>1.10E-03</b> |
| P | GO:0001403 | 30  | invasive growth                                                      | 5.40E-01        | 5.41E-01        | <b>1.61E-02</b> | <b>4.32E-02</b> | <b>2.17E-03</b> | <b>1.00E-02</b> |
| P | GO:0016570 | 59  | histone modification                                                 | <b>1.56E-03</b> | <b>7.85E-03</b> | <b>2.16E-04</b> | <b>1.64E-03</b> | <b>7.30E-06</b> | <b>1.14E-04</b> |
| P | GO:0006473 | 38  | protein amino acid acetylation                                       | <b>1.15E-02</b> | <b>3.45E-02</b> | <b>6.17E-03</b> | <b>2.19E-02</b> | <b>1.16E-04</b> | <b>1.00E-03</b> |
| P | GO:0006365 | 67  | 35S primary transcript processing                                    | <b>1.93E-03</b> | <b>9.16E-03</b> | <b>3.84E-06</b> | <b>7.23E-05</b> | <b>4.05E-03</b> | <b>1.59E-02</b> |
| P | GO:0006383 | 38  | transcription from RNA polymerase III promoter                       | <b>2.18E-02</b> | 5.30E-02        | <b>2.40E-02</b> | 5.66E-02        | <b>6.19E-03</b> | <b>2.19E-02</b> |
| P | GO:0043414 | 35  | biopolymer methylation                                               | <b>1.09E-03</b> | <b>5.93E-03</b> | <b>2.94E-03</b> | <b>1.28E-02</b> | <b>1.30E-02</b> | <b>3.78E-02</b> |
| P | GO:0030490 | 46  | processing of 20S pre-rRNA                                           | <b>3.45E-04</b> | <b>2.33E-03</b> | <b>1.32E-06</b> | <b>3.01E-05</b> | <b>4.18E-02</b> | 8.44E-02        |
| P | GO:0007005 | 95  | mitochondrion organization and biogenesis                            | <b>6.62E-05</b> | <b>7.02E-04</b> | <b>1.32E-04</b> | <b>1.07E-03</b> | <b>4.51E-06</b> | <b>8.02E-05</b> |
| P | GO:0006402 | 55  | mRNA catabolism                                                      | 6.97E-02        | 1.21E-01        | <b>3.06E-03</b> | <b>1.30E-02</b> | <b>9.57E-04</b> | <b>5.33E-03</b> |
| P | GO:0006289 | 31  | nucleotide-excision repair                                           | 1.18E-01        | 1.77E-01        | <b>3.42E-02</b> | 7.36E-02        | <b>1.74E-03</b> | <b>8.48E-03</b> |
| P | GO:0045944 | 48  | positive regulation of transcription from RNA polymerase II promoter | 1.10E-01        | 1.67E-01        | <b>1.63E-04</b> | <b>1.27E-03</b> | <b>4.17E-05</b> | <b>5.10E-04</b> |
| P | GO:0000154 | 89  | rRNA modification                                                    | <b>4.95E-02</b> | 9.35E-02        | <b>1.09E-03</b> | <b>5.93E-03</b> | 1.89E-01        | 2.57E-01        |
| P | GO:0006611 | 44  | protein-nucleus export                                               | <b>4.06E-02</b> | 8.30E-02        | <b>6.21E-04</b> | <b>3.71E-03</b> | <b>6.76E-03</b> | <b>2.30E-02</b> |
| P | GO:0006413 | 46  | translational initiation                                             | <b>2.03E-02</b> | 5.08E-02        | <b>1.07E-03</b> | <b>5.91E-03</b> | <b>3.58E-02</b> | 7.63E-02        |
| P | GO:0016044 | 31  | membrane organization and biogenesis                                 | <b>2.09E-03</b> | <b>9.85E-03</b> | <b>1.38E-03</b> | <b>7.18E-03</b> | <b>9.74E-03</b> | <b>3.06E-02</b> |
| P | GO:0009064 | 43  | glutamine family amino acid metabolism                               | <b>4.85E-02</b> | 9.24E-02        | <b>8.42E-05</b> | <b>8.16E-04</b> | 1.26E-01        | 1.86E-01        |
| P | GO:0006626 | 47  | protein-mitochondrial targeting                                      | <b>8.33E-06</b> | <b>1.27E-04</b> | <b>1.46E-06</b> | <b>3.11E-05</b> | <b>4.04E-04</b> | <b>2.59E-03</b> |
| P | GO:0009060 | 82  | aerobic respiration                                                  | <b>2.66E-08</b> | <b>8.96E-07</b> | <b>4.73E-09</b> | <b>1.78E-07</b> | <b>1.32E-06</b> | <b>3.01E-05</b> |
| P | GO:0006119 | 46  | oxidative phosphorylation                                            | <b>7.03E-07</b> | <b>2.04E-05</b> | <b>9.01E-07</b> | <b>2.31E-05</b> | <b>1.57E-04</b> | <b>1.24E-03</b> |
| P | GO:0006118 | 31  | electron transport                                                   | <b>1.22E-04</b> | <b>1.03E-03</b> | <b>1.01E-04</b> | <b>9.28E-04</b> | <b>4.29E-03</b> | <b>1.65E-02</b> |
