# Supplementary material for: Tor1/Sch9-Regulated Carbon Source Substitution Is as Effective as Calorie Restriction in Life Span Extension
Source: PubMed Central journal article supplement (PMC2669710; doi:10.1371/journal.pgen.1000467), 2009-05-08
Supplement: pgen.1000467.s013.pdf [file pgen.1000467.s013.pdf]

Table S7. Expression levels of genes involved in ergosterol biosynthesis

Adapted from SGD

|                                          |   | Public ID     | Gene  | <i>sch9Δ</i> | <i>tor1Δ</i> | <i>ras2Δ</i> |
|------------------------------------------|---|---------------|-------|--------------|--------------|--------------|
| 2 acetyl-CoA                             | ← | ERG10         | ERG10 | 1.00         | 1.12         | 1.18         |
| acetoacetyl-CoA                          | ← | ERG13         | ERG13 | 1.18         | 1.17         | 1.26         |
| 3-hydroxy-3-methyl-glutaryl-CoA          | ← | HMG1          | HMG1  | 1.47         | 1.65         | 1.59         |
| mevalonate                               | ← | HMG2          | HMG2  | 1.01         | 1.11         | 1.41         |
| mevalonate-5P                            | ← | ERG12         | ERG12 | 1.23         | 1.12         | 1.53         |
| mevalonate-5-PP                          | ← | MVD1/ERG19    | ERG8  | 1.17         | 1.07         | 0.75         |
| Δ <sup>3</sup> -isopentenyl-PP           | ← | IDI1          | MVD1  | 0.62         | 0.89         | 1.22         |
| dimethylallyl-pyrophosphate              | ← | ERG20         | IDI1  | 0.87         | 0.84         | 0.61         |
| geranyl-PP                               | ← | ERG20         | ERG20 | 1.01         | 1.19         | 0.80         |
| trans,trans-farnesyl diphosphate         | ← | ERG9          | ERG9  | 0.96         | 0.97         | 0.93         |
| squalene                                 | ← | ERG1          | ERG1  | 1.31         | 1.26         | 1.39         |
| +O <sub>2</sub> → (S)-2,3-Epoxy-squalene | ← | ERG7          | ERG7  | 0.84         | 0.69         | 1.00         |
| lanosterol                               | ← | ERG11         | ERG11 | 1.48         | 1.38         | 1.38         |
| 4,4-dimethyl-cholesta-8,12,24-trienol    | ← | ERG24         | ERG24 | 1.53         | 1.85         | 1.86         |
| 4,4-dimethyl-8,24-cholestadienol         | ← | ERG25         | ERG25 | 2.33         | 2.59         | 2.02         |
| 4,4-methyl-8,24-cholestadienol           | ← | ERG26,27 (28) | ERG6  | 1.77         | 2.23         | 1.15         |
| zymosterol                               | ← | ERG6 (28)     | ERG2  | 1.58         | 1.95         | 1.93         |
| fecosterol                               | ← | ERG3          | ERG3  | 1.83         | 1.99         | 1.61         |
| episterol                                | ← | ERG2          | ERG5  | 4.85         | 4.35         | 5.28         |
| 5,7,24(28)-ergostatrienol                | ← | ERG3          | ERG4  | 0.63         | 0.78         | 0.80         |
| 5,7,22,24(28)-ergostatetraenol           | ← | ERG5          | ERG26 | 0.75         | 0.99         | 1.15         |
| ergosterol                               | ← | ERG4          | ERG27 | 1.24         | 1.23         | 1.07         |
|                                          | ← | ERG4          | ERG28 | 2.02         | 1.70         | 2.50         |

ATP → ADP (red arrow)

NADPH → NADP (blue arrow)
