# Supplementary material for: Tor1/Sch9-Regulated Carbon Source Substitution Is as Effective as Calorie Restriction in Life Span Extension
Source: PLoS Genet. 2009 May 8;5(5):e1000467. doi: 10.1371/journal.pgen.1000467 (PMC2669710; doi:10.1371/journal.pgen.1000467)
Supplement: Table S6 — Expression levels of genes involved in glycerol metabolism in long-lived sch9Δ, tor1Δ, and ras2Δ mutants at day 2.5. The glycerol biosynthesis gene subset contains 21 genes. Denote the gene subset by S and the entire gene as a whole by G. We compared expressions of S against those in the complement of S in G denoted by G-S. The Wilcoxon rank test (one-sided) was performed. We found that glycerol biosynthesis gene set is up-regulated with p-value 0.0058 in sch9Δ, 0.0614 in tor1Δ, and 0.0142 in ras2Δ. For illustration purpose, gene expression levels that are 20% higher or lower than wild type cells are marked in red or green, respectively. 1 Data were expressed in fold change, WT = 1. 2 Array probe specificity. 3 Day 1.5-old SDC wild type (DBY746) cells were washed 3 times with water and incubated in water for 24 or 48 hours. Data represent fold change compared to wild type cells in SDC. (0.02 MB XLS) [file pgen.1000467.s012.xls]

## Sheet: T.S6 glycerol
Table S6. Expression levels of genes involved in glycerol metabolism1
	sch9∆	tor1∆	ras2∆	note2	CR-24h3	CR-48h3
glycerol biosynthesis
TGL1/YKL140W	1.20704	1.37486	1.27602	TGL1	0.800255	0.97853	Steryl ester hydrolase, one of three gene products (Yeh1p, Yeh2p, Tgl1p) responsible for steryl ester hydrolase activity and involved in sterol homeostasis, localized to lipid particle membranes
TGL2/YDR058C	1.21594	1.18271	1.29362	TGL2	0.850075	0.960378	Protein with lipolytic activity towards triacylglycerols and diacylglycerols when expressed in E. coli, role in yeast lipid degradation is unclear
ATG15/YCR068W	1.34878	1.18378	1.45839	ATG15	2.21332	2.29201	Lipase, required for intravacuolar lysis of autophagic bodies, located in the endoplasmic reticulum membrane and targeted to intravacuolar vesicles during autophagy via the multivesicular body (MVB) pathway
intracellular accumulation of glycerol
GPD1/YDL022W	2.36632	2.45199	2.75033	GPD1	0.683087	0.601594	NAD-dependent glycerol-3-phosphate dehydrogenase, key enzyme of glycerol synthesis, essential for growth under osmotic stress, expression regulated by high-osmolarity glycerol response pathway, homolog of Gpd2p
GPD2/YOL059W	1.41939	1.93693	2.50396	GPD2	0.755227	0.77505	NAD-dependent glycerol 3-phosphate dehydrogenase, homolog of Gpd1p, expression is controlled by an oxygen-independent signaling pathway required to regulate metabolism under anoxic conditions, located in cytosol and mitochondria
RHR2/YIL053W	1.67324	1.21898	1.22129	RHR2	0.613643	0.395484	Constitutively expressed isoform of DL-glycerol-3-phosphatase, involved in glycerol biosynthesis, induced in response to both anaerobic and, along with the Hor2pGpp2p isoform, osmotic stress
HOR2/YER062C	1.5944	1.10657	1.26418	HOR2	0.723724	0.447566	One of two redundant DL-glycerol-3-phosphatases (RHR2GPP1 encodes the other) involved in glycerol biosynthesis, induced in response to hyperosmotic stress and oxidative stress, and during the diauxic transition
YIG1/YPL201C	0.497949	0.535166	0.446451	YIG1	0.944152	1.69096	Hypothetical protein
GCY1/YOR120W	1.12223	1.08482	0.864805	GCY1	0.90025	0.742084	Putative NADP(+) coupled glycerol dehydrogenase, proposed to be involved in an alternative pathway for glycerol catabolism
YPR1/YDR368W	1.11155	1.14098	1.13981	YPR1	1.50513	1.69621	2-methylbutyraldehyde reductase, may be involved in isoleucine catabolism
DAK1/YML070W	2.25275	1.75911	2.81402	DAK1	0.746965	0.794242	Dihydroxyacetone kinase, required for detoxification of dihydroxyacetone (DHA), involved in stress adaptation
DAK2/YFL053W	1.88097	1.5328	19.0972	DAK2	0.708178	0.778619	Dihydroxyacetone kinase, required for detoxification of dihydroxyacetone (DHA), involved in stress adaptation
glycerol degradation
GUT1/YHL032C	0.862868	0.977613	0.970781	GUT1	1.52356	1.4572	Glycerol kinase, converts glycerol to glycerol-3-phosphate, glucose repression of expression is mediated by Adr1p and Ino2p-Ino4p, derepression of expression on non-fermentable carbon sources is mediated by Opi1p and Rsf1p
GUT2/YIL155C	1.13817	0.973801	0.934504	GUT2	1.5913	1.29485	Mitochondrial glycerol-3-phosphate dehydrogenase, expression is repressed by both glucose and cAMP and derepressed by non-fermentable carbon sources in a Snf1p, Rsf1p, Hap2345 complex dependent manner
glycerol catabolism essentials
BRE1/YDL074C	0.709292	0.659982	0.535951	BRE1	1.21815	1.06675	E3 ubiquitin ligase for Rad6p, required for the ubiquitination of histone H2B, recruitment of Rad6p to promoter chromatin and subsequent methylation of histone H3 (on L4 and L79), contains RING finger domain
TCO89/YPL180W	1.00528	0.923233	0.682351	TCO89	2.18178	1.71471	Subunit of TORC1 (Tor1p or Tor2p-Kog1p-Lst8p-Tco89p), a complex that regulates growth in response to nutrient availability, cooperates with Ssd1p in the maintenance of cellular integrity, deletion strains are hypersensitive to rapamycin
SPT7/YBR081C	1.04021	0.960308	0.83446	SPT7	1.3131	0.947813	Subunit of the SAGA transcriptional regulatory complex, involved in proper assembly of the complex, also present as a C-terminally truncated form in the SLIKSALSA transcriptional regulatory complex
proton/glycerol symporter
FPS1/YLL043W	1.1	0.87	0.76	FPS1	1.24884	0.969943	Plasma membrane glycerol channel, member of the major intrinsic protein (MIP) family of channel proteins, involved in efflux of glycerol and in uptake of the trivalent metalloids arsenite and antimonite
GUP1/YGL084C	1.07	1.08	1.4	GUP1	1.02437	1.37061	Plasma membrane protein with a possible role in proton symport of glycerol, member of the MBOAT family of putative membrane-bound O-acyltransferases
GUP2/YPL189W	0.58	0.82	1.47	GUP2	1.09039	1.04389	Probable membrane protein with a possible role in proton symport of glycerol, member of the MBOAT family of putative membrane-bound O-acyltransferases, Gup1p homolog
STL1/YDR536W	1.34	1.13	1.44	STL1	0.10494	0.136195	Glycerol proton symporter of the plasma membrane, subject to glucose-induced inactivation, strongly but transiently induced when cells are subjected to osmotic shock
